# Supplementary material for: The transcription factor Slug represses p16Ink4a and regulates murine muscle stem cell aging
Source: PubMed Central journal article supplement (PMC6561969; doi:10.1038/s41467-019-10479-4), 2019-06-12
Supplement: 41467_2019_10479_MOESM1_ESM.pdf [file 41467_2019_10479_MOESM1_ESM.pdf]

## SUPPLEMENTARY INFORMATION

### **The transcription factor Slug represses p16Ink4a and regulates murine muscle stem cell aging**

Zhu et al.

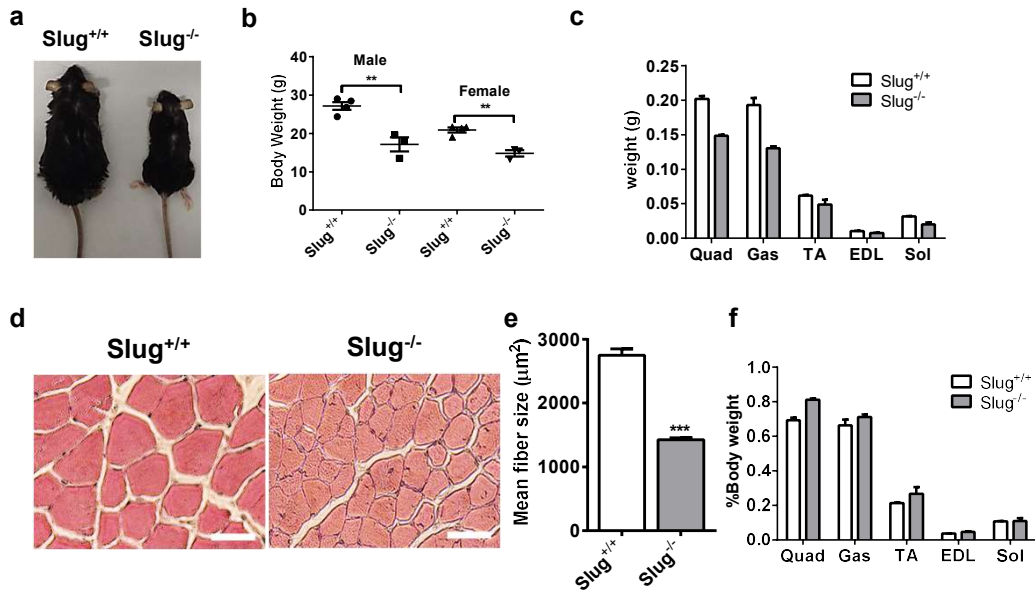

**Supplementary Figure 1. *Slug* knockout mice were abnormal in body size, weight and skeletal muscle.**

- a.** Physical appearance of adult *Slug*<sup>+/+</sup> and *Slug*<sup>-/-</sup> mice.
- b.** The body weights of male and female adult *Slug*<sup>-/-</sup> mice and their corresponding wild-type mice (n = 3-4 mice per genotype) \*\*p < 0.01 by Student's *t* test.
- c.** Comparison of the weights of hindlimb muscles between adult *Slug*<sup>-/-</sup> and wild-type mice. Quad, quadriceps; Gas, gastrocnemius; TA, tibialis anterior; EDL, extensor digitorum longus; Sol, soleus.
- d.** Representative H&E staining of the intact TA muscles in *Slug*<sup>+/+</sup> and *Slug*<sup>-/-</sup> mice (n = 3 mice per group). Scale bar, 50 µm.
- e.** Quantification of the mean myofiber cross-sectional area (CSA, µm<sup>2</sup>) of the intact TA muscles in (d).
- f.** The weights of different hindlimb muscles were normalized to body weight.

Source data are provided as a Source Data file.

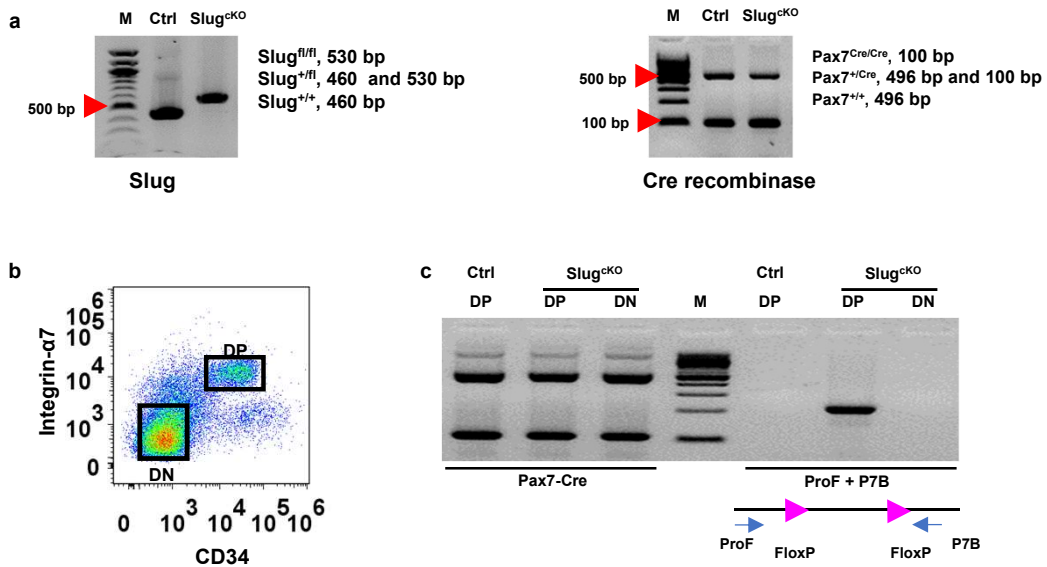

**Supplementary Figure 2. Genotyping PCR confirming conditional knockout of Slug in SCs.**

- a.** Genotyping PCR amplifying Slug and Cre recombinase in tail lysates. Ctrl refers to a genotype of Slug<sup>+/+</sup>Pax7<sup>Cre/+</sup>, Slug<sup>CKO</sup> refers to a genotype of Slug<sup>fl/fl</sup>Pax7<sup>Cre/+</sup>.
- b.** Representative flow cytometry plots for gating MuSCs (DP, integrin- $\alpha$ 7<sup>+</sup>CD34<sup>+</sup>) and non-MuSCs (DN, integrin- $\alpha$ 7<sup>-</sup>CD34<sup>-</sup>) in CD45<sup>-</sup>CD11b<sup>-</sup>CD31<sup>-</sup>Sca1<sup>-</sup> subpopulation.
- c.** Genotyping PCR amplifying Cre recombinase and Slug in SCs (MuSCs) and non-MuSCs lysates. M, 100-bp DNA ladder.

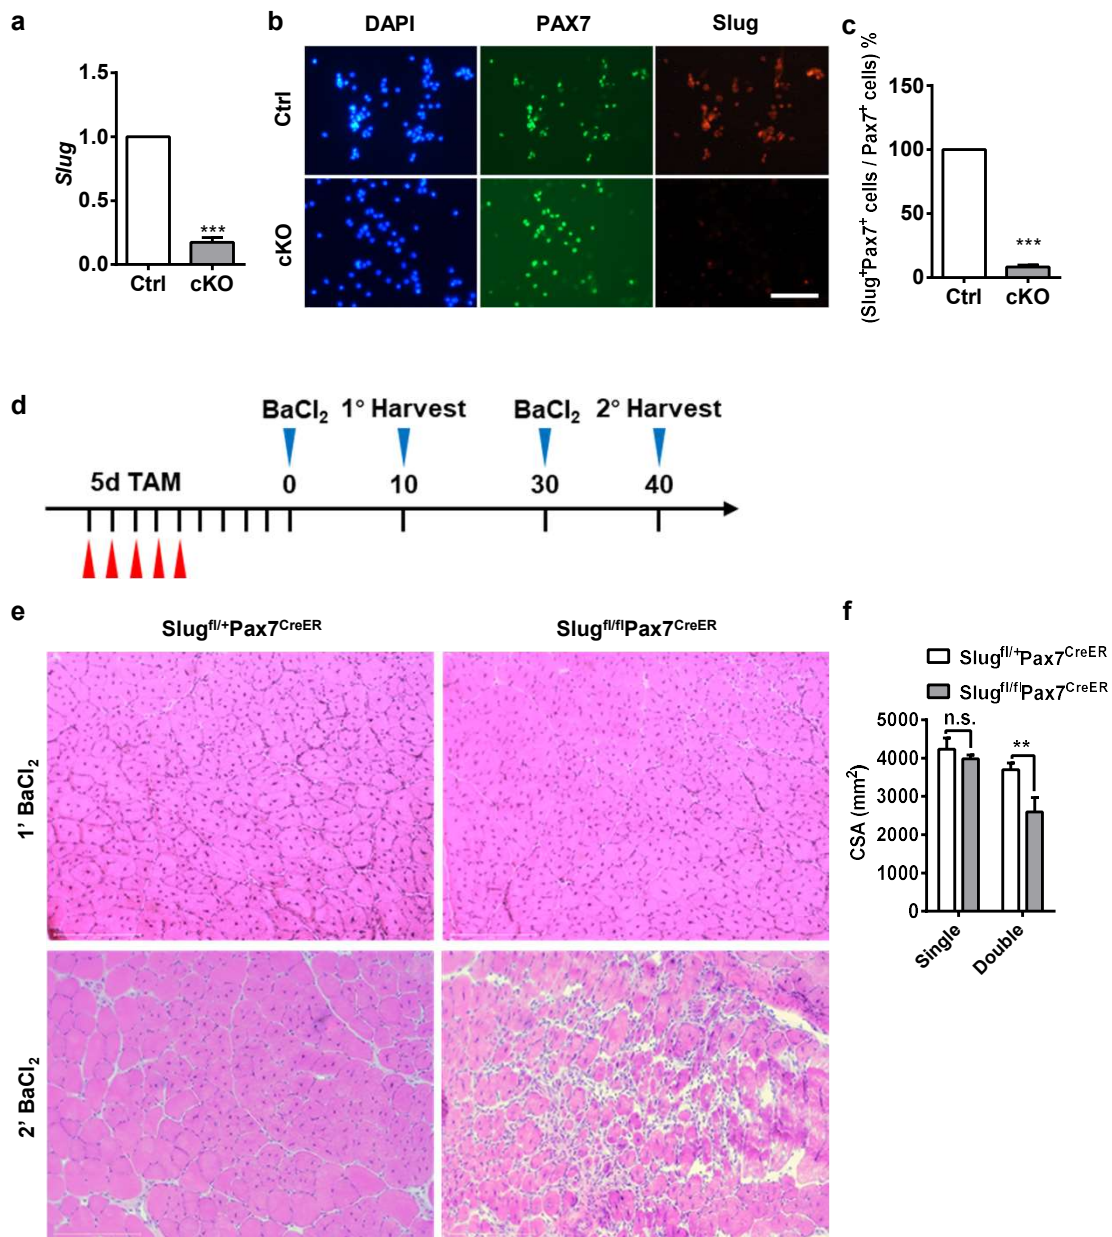

**Supplementary Figure 3. Muscle regeneration defect in tamoxifen-induced adult SC-conditional knockout mice.**

- a.** qPCR analysis of tamoxifen-induced *Slug* deletion in adult SCs ( $n = 3$  mice per group). Ctrl, *Slug*<sup>+/+</sup>*Pax7*<sup>CreER</sup>; cKO, *Slug*<sup>fl/fl</sup>*Pax7*<sup>CreER</sup>. \*\*\* $p < 0.001$  by student's  $t$  test.
- b.** Immunofluorescence staining of *Slug* protein in SCs of Ctrl and *Slug*<sup>cKO</sup> mice. Scale bar, 200  $\mu\text{m}$ .
- c.** Quantification of *Slug*-expressing SCs (*Slug*<sup>+</sup>*Pax7*<sup>+</sup>) as stained in (b).
- d.** Tamoxifen (TAM) regimen, muscle injury and harvest scheme.
- e.** H&E staining of single and double injured TA muscles in *Slug*<sup>+/+</sup>*Pax7*<sup>CreER</sup> and *Slug*<sup>fl/fl</sup>*Pax7*<sup>CreER</sup> mice ( $n = 5$  mice per group). Scale bar, 200  $\mu\text{m}$ .
- f.** Quantification of the myofiber CSA ( $\text{mm}^2$ ) of single and double injured TA muscles. \*\* $p < 0.01$  by student's  $t$  test. (n.s., not significant).  
Data are shown as mean  $\pm$  SEM of three independent experiments. Source data are provided as a Source Data file.

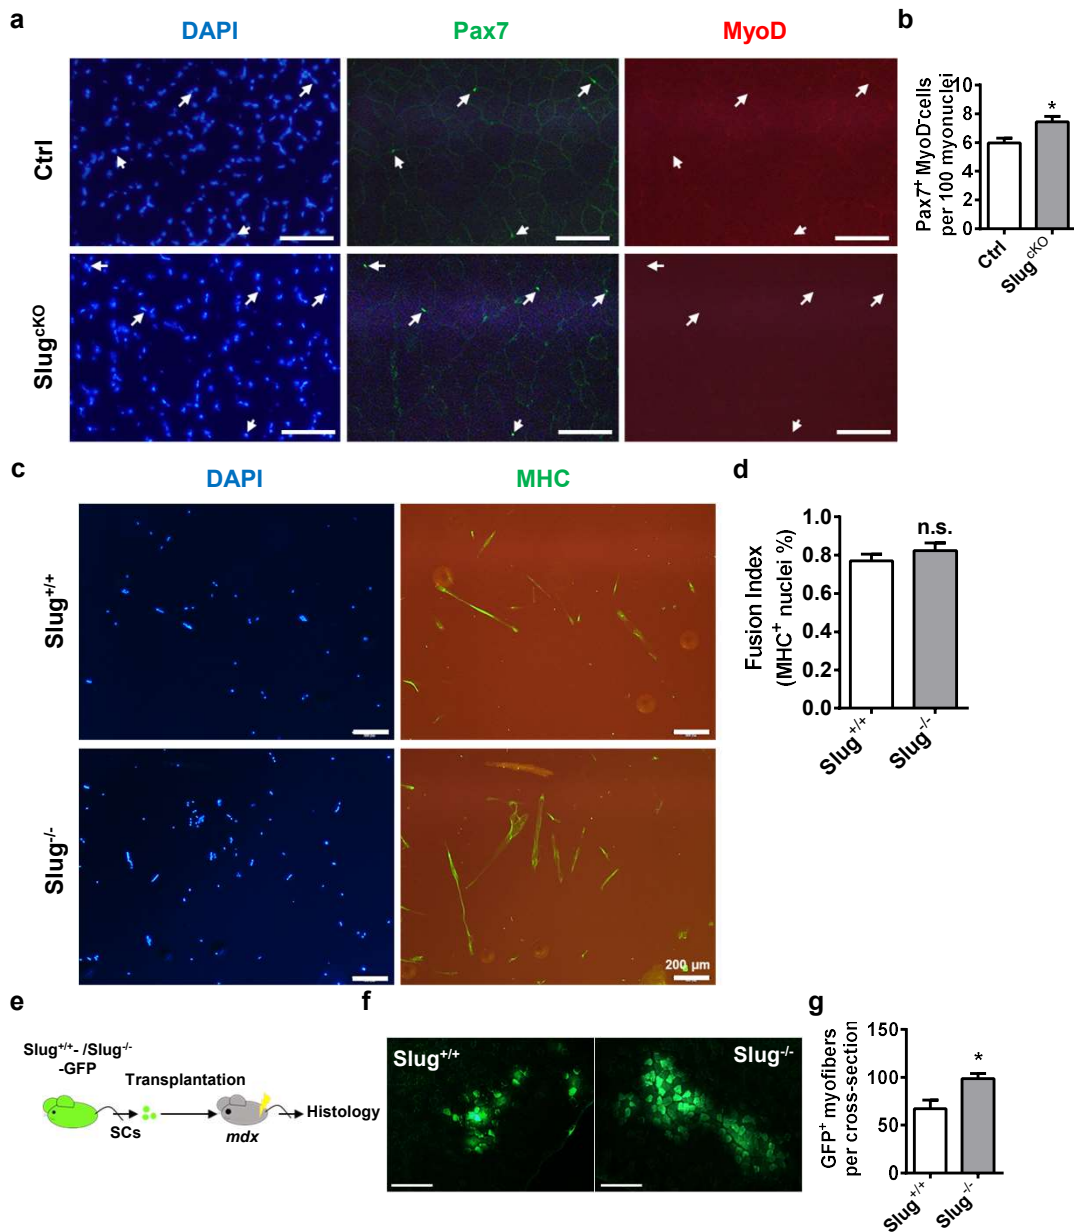

**Supplementary Figure 4. Loss of Slug does not impede quiescent SCs from activation and differentiation.**

**a.** Immunohistochemistry of Pax7 and MyoD on transverse sections of resting TA muscles from Ctrl and Slug<sup>CKO</sup> mice. Scale bar, 100  $\mu$ m.

**b.** Quantification of Pax7<sup>+</sup>MyoD<sup>-</sup> SCs as stained in (a). \*p < 0.05 by student's *t* test.

**c.** Myosin heavy chain (MHC) immunostaining. Primary Slug<sup>+/+</sup> and Slug<sup>-/-</sup> myoblasts were induced for differentiation for 3 days. Scale bar, 200  $\mu$ m.

**d.** Quantification of fusion index by calculating percentage of nuclei in MHC<sup>+</sup> myotubes as stained in (c). n.s., not significant.

**e.** Scheme of SC transplantation. 3000 freshly isolated SCs from Slug<sup>-/-</sup>GFP-transgenic mice were transplanted immediately into one side of BaCl<sub>2</sub>-preinjured TA muscles of mdx recipients (n = 6 mice). An equal number of SCs from Slug<sup>+/+</sup>GFP-transgenic mice were injected into contralateral TA muscles of the same recipients as controls. The TA muscles were harvested 4 weeks after transplantation for assessing engrafting efficiency.

**f.** Representative fluorescent micrographs of GFP-expressing myofibers in frozen TA muscle sections of mdx recipient mice described in (d). Scale bar, 100  $\mu$ m.

**g.** Quantification of the number of GFP-expressing myofibers in (f). \*p < 0.05 by student's *t* test. Data are presented as mean  $\pm$  SEM of three independent experiments. Source data are provided as a Source Data file.

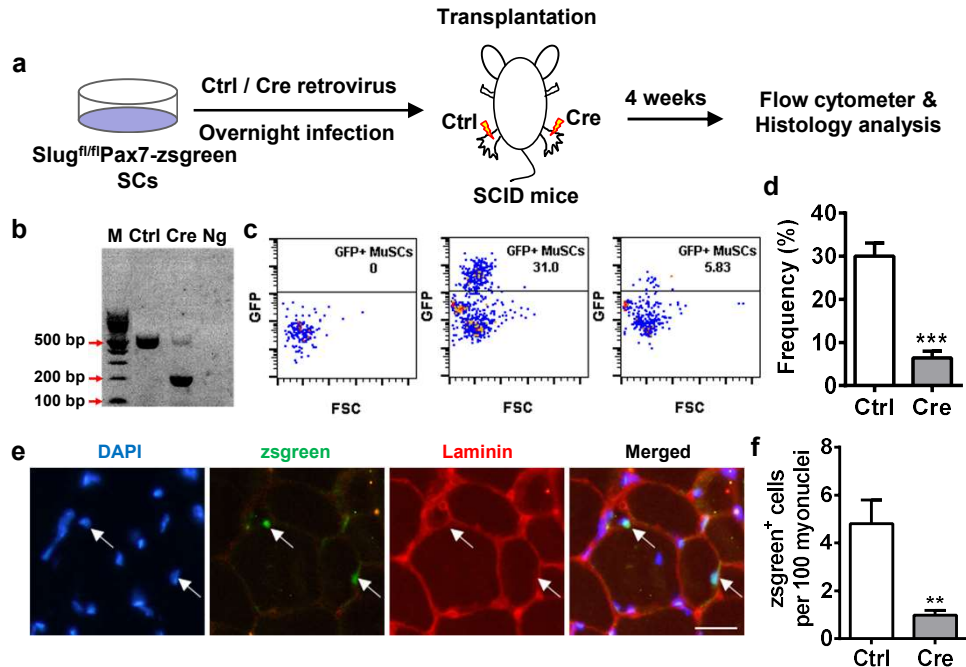

### Supplementary Figure 5. Loss of Slug attenuates SC self-renewal capacity.

- a.** Scheme of *invitro* *Slug* knockout and transplantation-derived SCs. *Slug<sup>fl/fl</sup>Pax7-zsgreen* SCs were infected with lentiviral Cre-recombinase and transplanted into pre-injured TAs of SCID recipients (n = 6 SCID recipients). SCs infected with blank lentiviral vector were injected into the contralateral TAs as control. SC repopulation was analyzed 4 weeks later by flow cytometer and histology analysis.
- b.** Genotyping PCR confirming viral Cre recombinase-mediated deletion of *Slug* DNA between the two LoxP sequences. PCR products of 530- and 190-bp were expected to be amplified before and after deletion of *Slug* DNA fragment, respectively. M, DNA marker; Ng, negative control for PCR.
- c.** Representative flow cytometric analysis of the frequency of donor-derived SCs (GFP<sup>+</sup>) within total recipient MuSCs (CD45<sup>-</sup>/CD31<sup>-</sup>/Sca1<sup>-</sup>/Vcam1<sup>+</sup>). Muscle cells from TA muscles of untransplanted SCID mice were used as control for setting gate of GFP-negative SCs.
- d.** Quantification of donor-derived SCs (GFP<sup>+</sup>) shown in (c). \*\*\*p < 0.001 by student's *t* test.
- e.** Immunohistochemical analysis of zsgreen and Laminin in recipient muscles transplanted with Ctrl- or Cre-lentivirus-infected SCs. Arrows indicated zsgreen<sup>+</sup> cells in satellite cell position. Scale bar, 25 μm.
- f.** Quantification of donor-derived SCs homing to the satellite cell position after viral infection and transplantation as stained in (e). \*\*p < 0.01 by student's *t* test. Data are presented as mean ± SEM of three independent experiments. Source data are provided as a Source Data file.

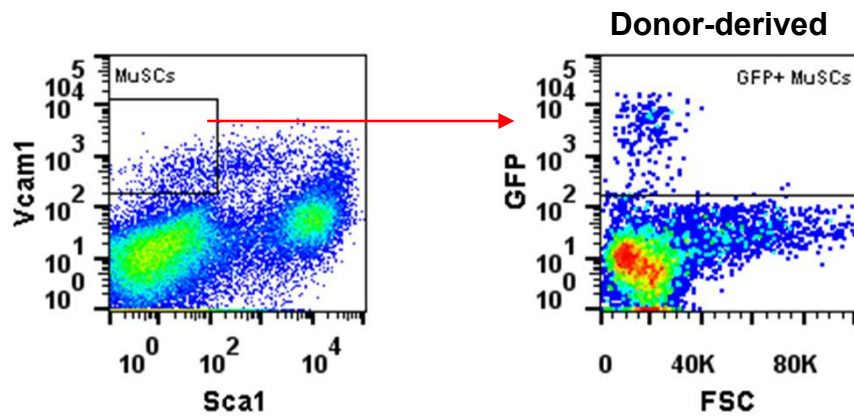

**Input genomic DNA (Slug<sup>+/+</sup> : Slug<sup>-/-</sup>)**

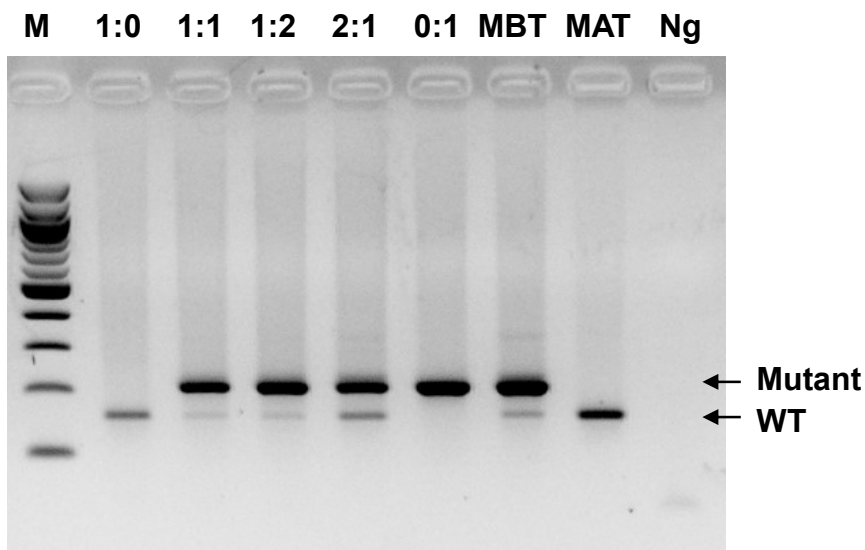

**Supplementary Figure 6. An independent repeat of the SC competitive repopulation assay.**

SCs from Slug<sup>+/+</sup>GFP<sup>-</sup> and Slug<sup>-/-</sup>GFP<sup>-</sup> transgenic mice were mixed at a ratio of 1:1. A small portion of the mixed cells were set aside for extraction of genomic DNA as a control. The remaining cells were then transplanted into pre-injured TA muscles of *mdx* recipients. Four weeks after transplantation, GFP<sup>+</sup> cells were sorted from recipient MuSCs (CD45<sup>-</sup>CD31<sup>-</sup>Sca1<sup>+</sup>Vcam1<sup>+</sup>), and subjected to genomic DNA extraction. A series of standard samples by pre-mixing genomic DNAs from each genotype of muscle cells at indicated ratio (Slug<sup>+/+</sup> vs Slug<sup>-/-</sup>) were used as input for PCR analysis. PCR-products of 157- and 209-bp DNA bands were expected to be amplified from wild-type (WT) and Slug knockout (Mutant) donor-derived genomic DNA, respectively. M, 100-bp DNA ladder; MBT, mixed SCs before transplantation; MAT, mixed SCs after transplantation; Ng, negative PCR control.

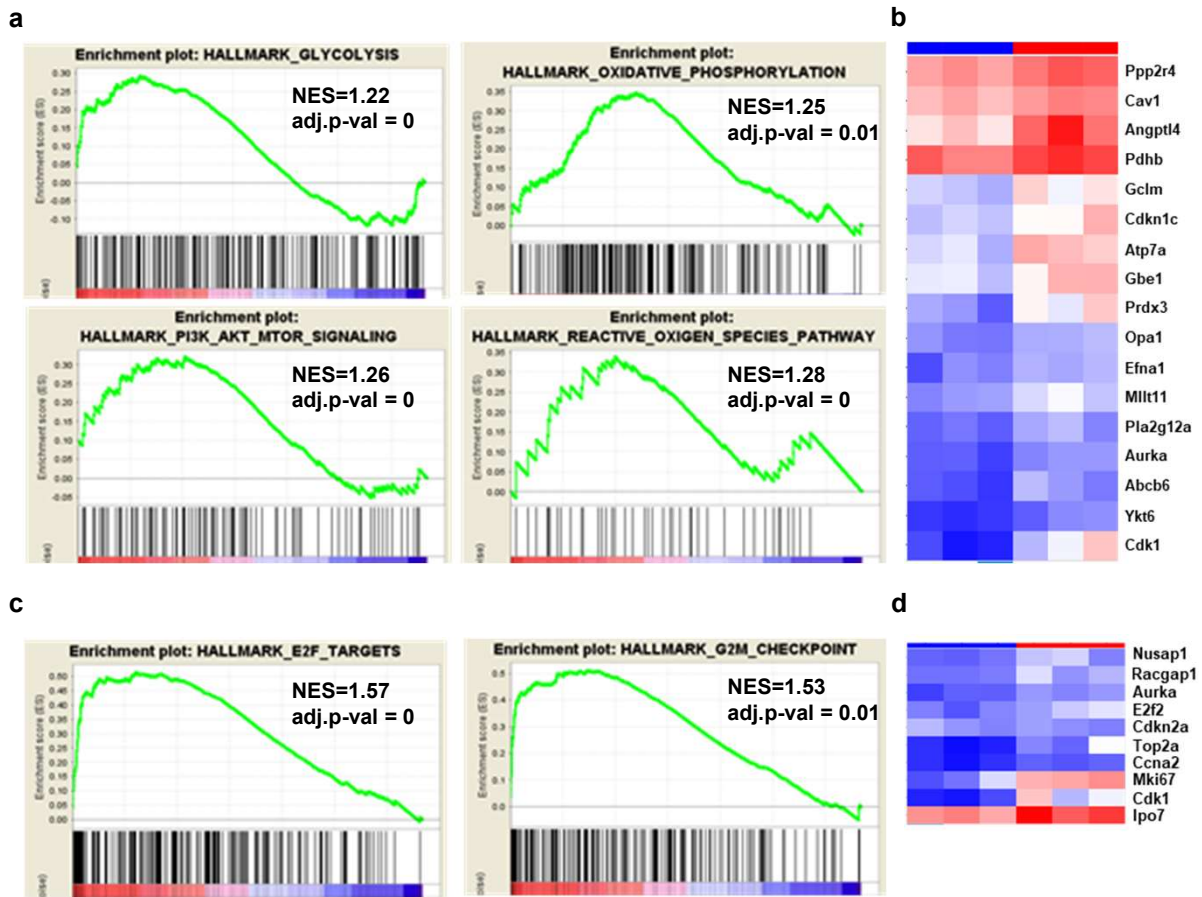

**Supplementary Figure 7. altered signaling pathways in Slug-deficient SCs.**

- a.** GSEA enrichment plots for cell metabolism-related pathways.
- b.** Heatmap showing list of anaerobic and aerobic metabolism pathways-associated genes being up-regulated in Slug-deficient SCs.
- c.** GSEA enrichment plots for cell cycle-related pathways.
- d.** Heatmap showing list of cell cycle regulators being up-regulated in Slug-deficient SCs.



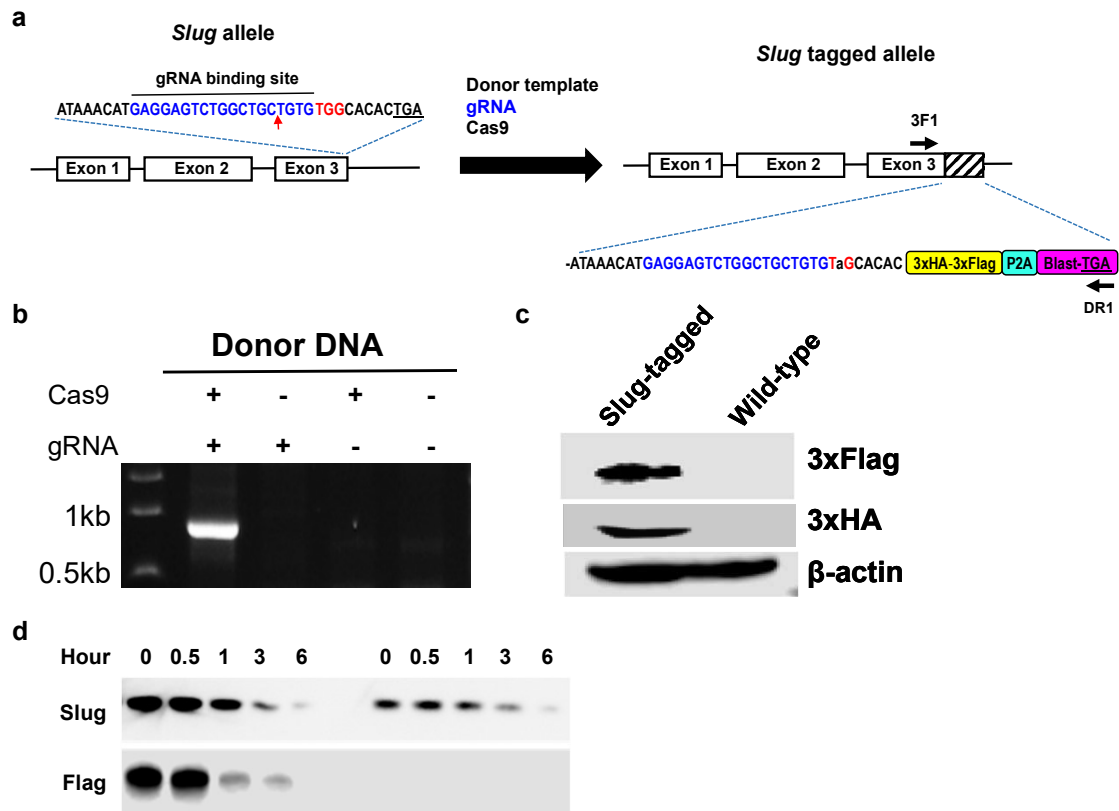

**Supplementary Figure 8. Epitope Tagging of endogenous Slug by CRISPR/Cas9-based Genome Editing.**

**a.** Illustrative epitope tagging of endogenous Slug in myoblasts by CRISPR/Cas9-mediated genome editing.

**b.** Validation of the correct donor integration. A DNA fragment with an expected size (~900 bp) was amplified only from genomic DNA of myoblasts transfected with the donor plasmid, Cas9 and gRNA.

**c.** Western blot confirming the correct epitope tagging of Slug.

**d.** Western blot determining half-life of endogenous Slug protein before and after epitope tagging. Myoblasts were cultured without or with cycloheximide for indicated incubation times.

Source data are provided as a Source Data file.

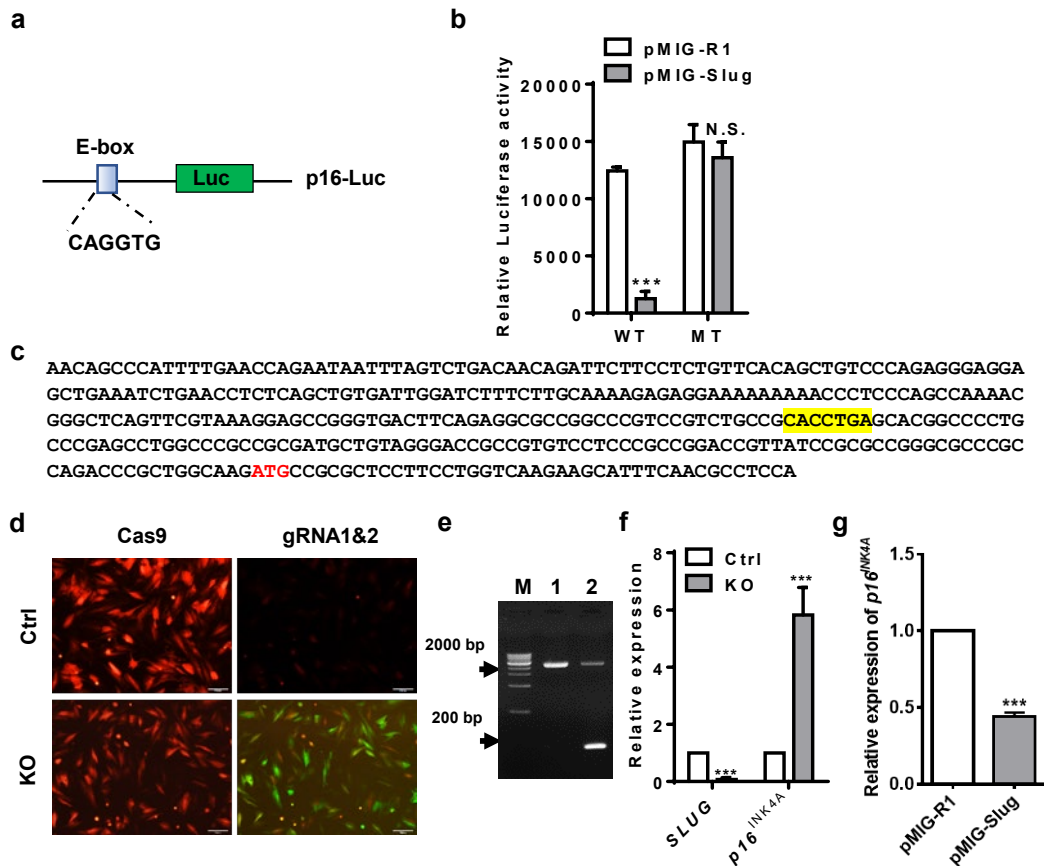

**Supplementary Figure 9. Slug directly regulates  $p16^{INK4a}$  promoter and is conserved in mouse and human.**

**a.** Diagram of the luciferase reporters for the  $p16^{INK4a}$  promoter.

**b.** Diagram for  $p16^{INK4a}$  luciferase reporter assay.

**c.** Conserved E-box element (highlighted in yellow) in human  $p16^{INK4A}$  promoter.

Transcription start codon (ATG) of human  $p16^{INK4A}$  was highlighted in red.

**d.** Representative images showing infection of primary human myoblasts by adenovirus expressing CRISPR/Cas9 (red) and adeno-associated virus expressing two sgRNAs targeting slug sequence (green). Scale bar, 100  $\mu$ m.

**e.** Genotyping PCR indicating gRNAs-mediated cutting of *SLUG* genomic DNA by CRISPR/Cas9. 1, AdR-Cas9 infected myoblasts; 2, AdR-Cas9 and AAV-gRNAs infected myoblasts; M, DNA marker.

**f.** qPCR analysis of  $p16^{INK4A}$  expression in Ctrl (Cas9 only) and *SLUG* KO (Cas9 and gRNAs) primary human myoblasts. \*\*\*,  $p < 0.001$  by student's *t* test.

**g.** qPCR analysis of  $p16^{INK4A}$  expression in control (pMIG-R1) and *SLUG* overexpressing (pMIG-Slug) primary human myoblasts. \*\*\*,  $p < 0.001$  by student's *t* test.

Data are shown as mean  $\pm$  SEM of three independent experiments. Source data are provided as a Source Data file.

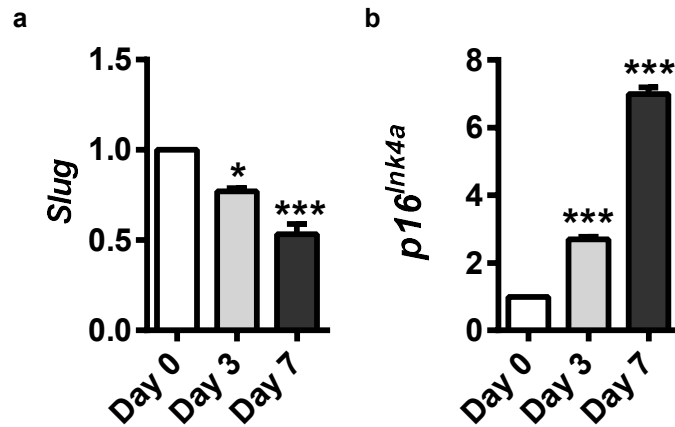

**Supplementary Figure 10. Time-dependent expression of *Slug* and *p16<sup>lnk4a</sup>* in ex-vivo cultured myoblasts.**

**a.** qPCR analysis of *Slug* expression in primary myoblasts on indicated days of culture. \*p < 0.05, \*\*\*p < 0.001 by student's *t* test.

**b.** qPCR analysis of *p16<sup>lnk4a</sup>* in cultured primary myoblasts. \*\*\*p < 0.001 by student's *t* test. Data are shown as mean ± SEM of three independent experiments. Source data are provided as a Source Data file.

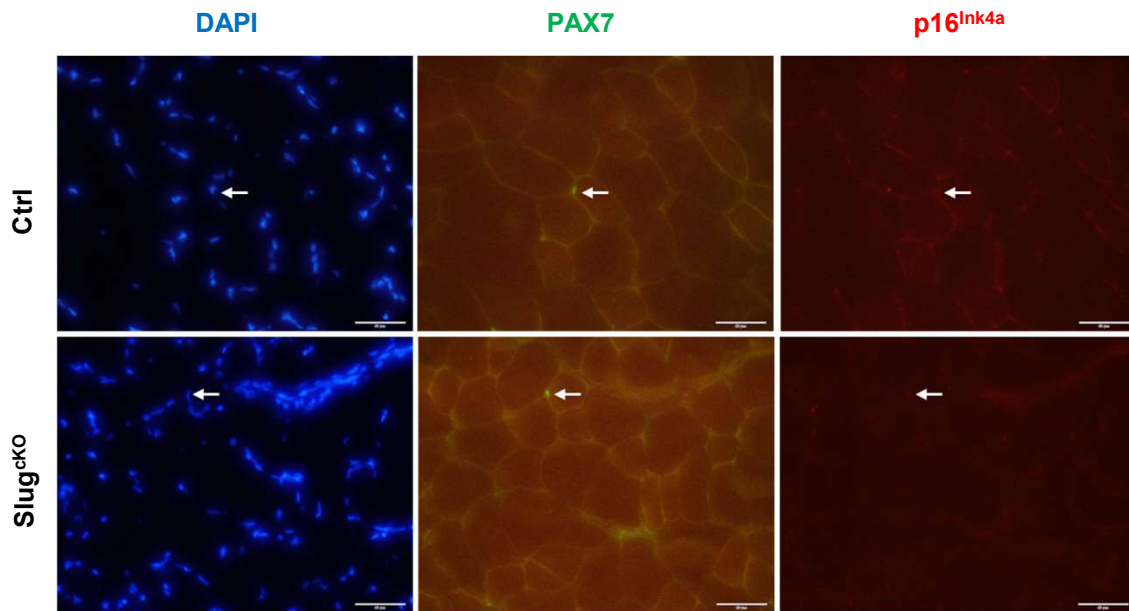

**Supplementary Figure 11. Immunohistochemistry for Pax7 and p16<sup>Ink4a</sup>.**

Representative images of IHC co-staining of Pax7 and p16<sup>Ink4a</sup> protein in SCs within the resting TA muscle of Ctrl and Slug<sup>cko</sup> mice (n = 3 mice per genotype). DAPI was used as nuclear counterstaining. White arrows indicate SCs in the section. Scale bar, 50  $\mu$ m.

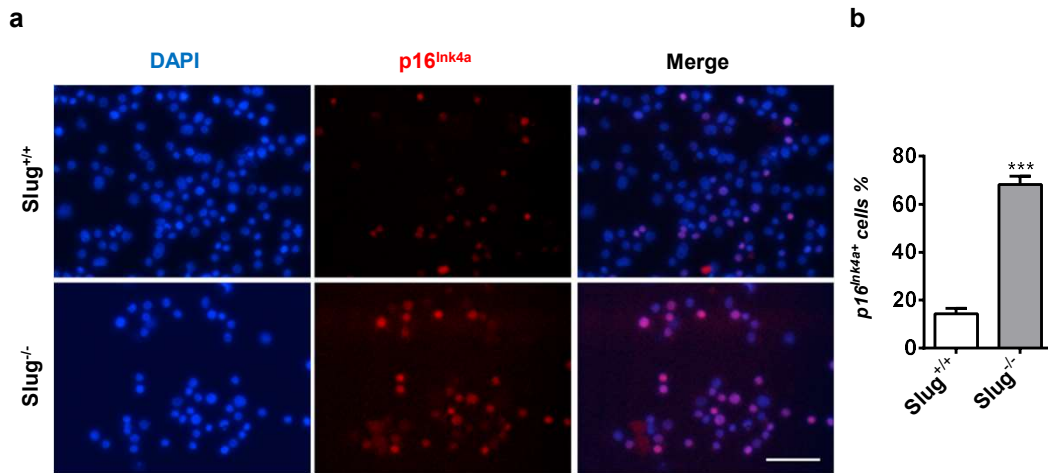

**Supplementary Figure 12. p16<sup>Ink4a</sup> protein expression in *Slug*<sup>+/+</sup> and *Slug*<sup>-/-</sup> reserve cell-derived progeny.**

**a.** p16<sup>Ink4a</sup> immunostaining. ZsGreen<sup>+</sup> SCs were sorted from hindlimb skeletal muscles of *Slug*<sup>+/+</sup>*Pax7*-zsGreen and *Slug*<sup>-/-</sup>*Pax7*-zsGreen transgenic mice, respectively, and differentiated for 21 days. Confluent myotubes and associated mononucleated cells were then trypsinized and dissociated. Five thousand of sorted zsGreen<sup>+</sup> reserve cells were re-plated to subculture for another 7 days. p16<sup>Ink4a</sup> immunostaining was performed on cells at day 7 post culture. Scale bar, 100  $\mu$ m.

**b.** Quantification of percentage of p16<sup>Ink4a</sup> positive cells being stained in (a). Data are shown as mean  $\pm$  SEM of three independent experiments. \*\*\*p < 0.001 by student's *t* test. Source data are provided as a Source Data file.

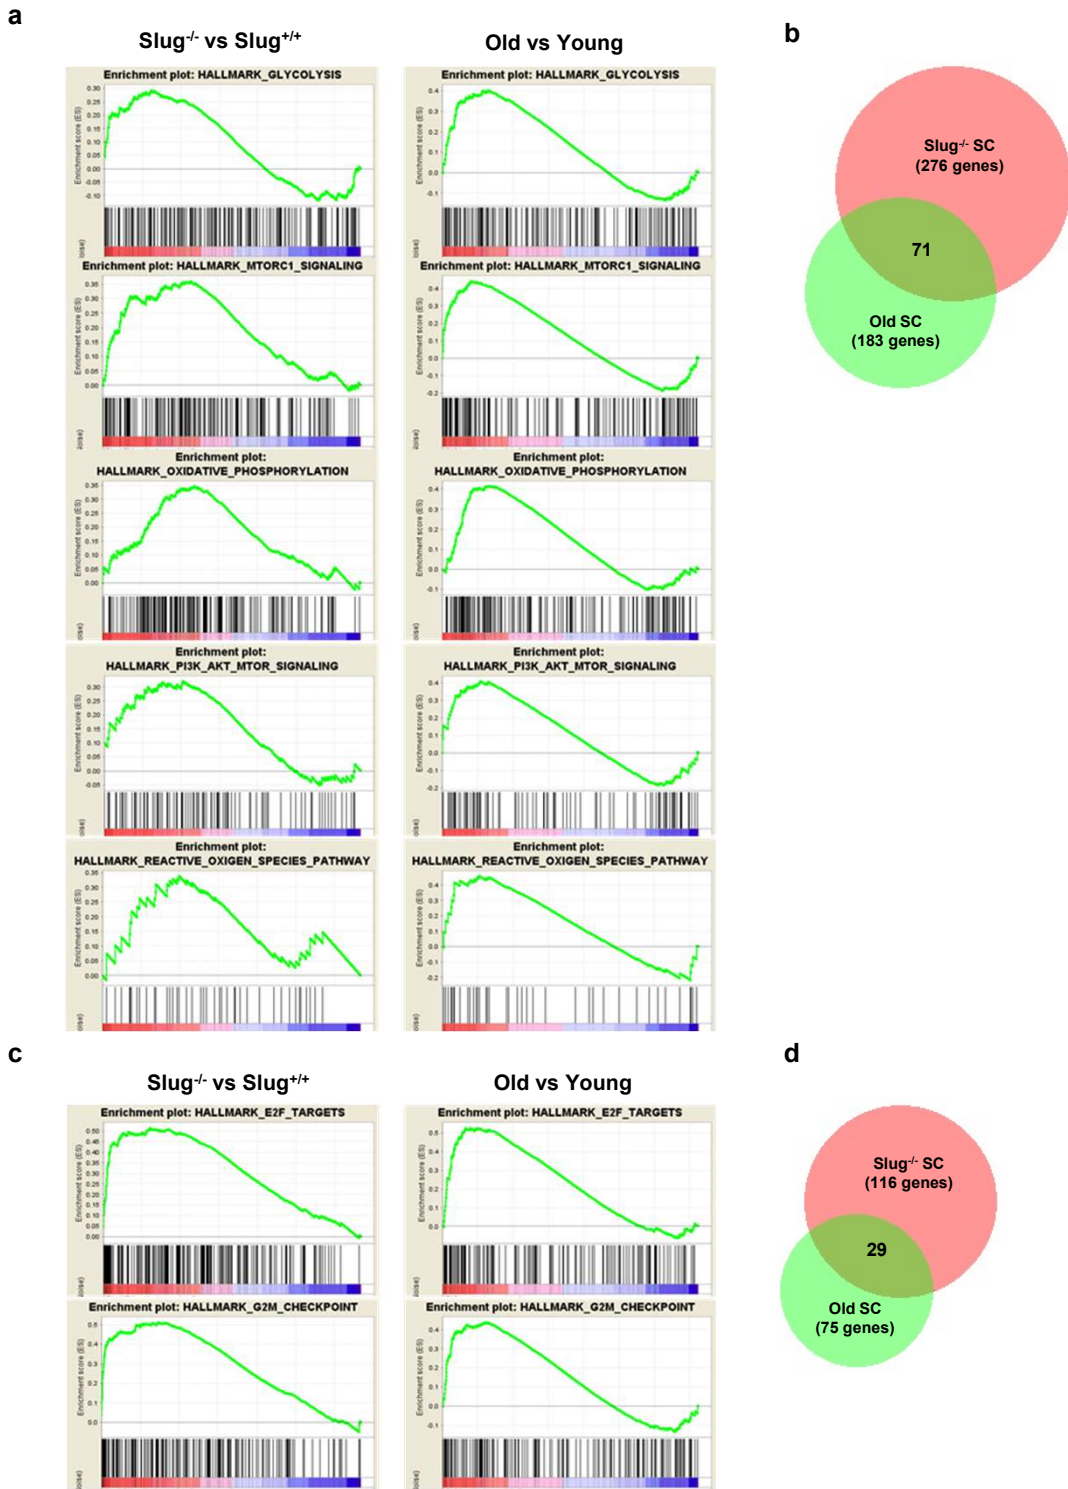

**Supplementary Figure 13. Slug<sup>-/-</sup> SCs resemble aged SCs in altered signaling pathways.**

- a.** GSEA enrichment plots comparing aerobic metabolism pathways activated in *Slug<sup>-/-</sup>* and old SCs.
- b.** Venn diagram of the overlap between significantly up-regulated genes involved in aerobic metabolism pathways in *Slug<sup>-/-</sup>* and old SCs compared to *Slug<sup>+/+</sup>* and young SCs, respectively.
- c.** GSEA enrichment plots showing cell cycle regulators induced in *Slug<sup>-/-</sup>* and old SCs.
- d.** Venn diagram of the overlap between significantly up-regulated genes involved in cell cycle regulators in *Slug<sup>-/-</sup>* and old SCs compared to *Slug<sup>+/+</sup>* and young SCs, respectively.

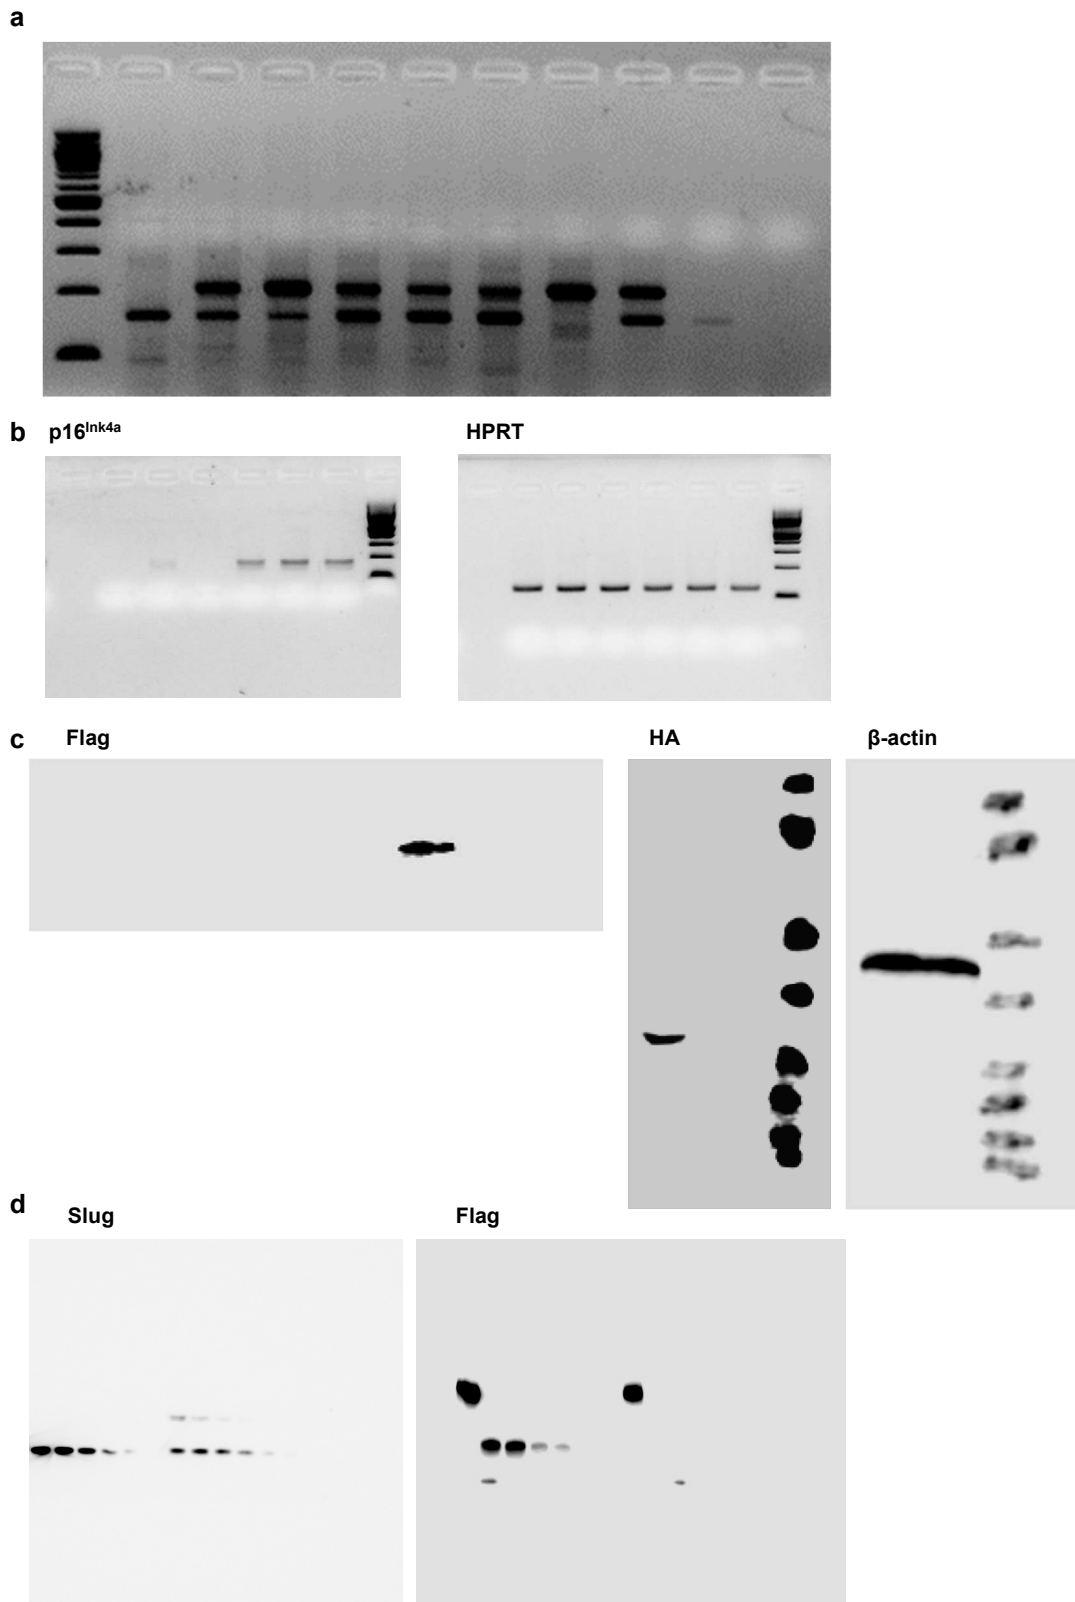

**Supplementary Figure 14. Unprocessed protein and DNA gel blots.**

**a.** Original gel imaging for **Fig. 3h**.

**b.** Original gel imaging for **Fig. 7c**.

**c.** Original western blot for **Supplementary Figure 8c**.

**d.** Original western blot for **Supplementary Figure 8d**.

**Supplementary Table 1. List of the primers and sequences in the study**

| <b>Primers</b>                                | <b>sequences (5'-3')</b>      |
|-----------------------------------------------|-------------------------------|
| <b>Primers for quantitative real-time PCR</b> |                               |
| Slug-qF                                       | GCGAACTGGACACACACACAGTTAT     |
| Slug-qR                                       | GCTGCCGACGATGTCCATACAGTAAT    |
| p16 <sup>Ink4a</sup> -F                       | ATGGAGTCCGCTGCAGACAGACTG      |
| p16 <sup>Ink4a</sup> -R                       | CGTTGCCCATCATCATCACCTGAATCGG  |
| p19 <sup>Arf</sup> -qF                        | GGTTCTTGGTCACTGTGAGGATTCAGCG  |
| p19 <sup>Arf</sup> -qR                        | TTGCCCATCATCATCACCTGGTCCAGG   |
| HPRT-qF                                       | CTCATGGACTGATTATGGACAGGAC     |
| HPRT-qR                                       | GCAGGTCAGCAAAGAACTTATAGCC     |
| p16 <sup>INK4A</sup> -F (human)               | AGCAGCATGGAGCCTTCGG           |
| p16 <sup>INK4A</sup> -R (human)               | GCCCATCATCATGACCTGGATCG       |
| GAPDH-F (human)                               | ATTGACCTCAACTACATGGTTTACATG   |
| GAPDH-R (human)                               | TTGGAGGGATCTCGCTCCTGGAAG      |
| <b>Primers for genotyping</b>                 |                               |
| WTS1 (SlugKO)                                 | TTCTACGTTCTCTGGGCTGG          |
| WTA1 (SlugKO)                                 | GATCTTGACAGACACAAGGCA         |
| KOA2 (SlugKO)                                 | ATTCATCGATGGCCGCTCTA          |
| C015 (p16 KO)                                 | GGCAAATAGCGCCACCTAT           |
| C016 (p16 KO)                                 | GACTCCATGCTGCTCCAGAT          |
| C017 (p16 KO)                                 | GCCGCTGGACCTAATAACTTC         |
| 14443 (Cre)                                   | CTCCTCCACATTCCTTGCTC          |
| 14444 (Cre)                                   | CGGCCTTCTTCTAGGTTCTG          |
| oIMR1084 (Cre)                                | GCGGTCTGGCAGTAAAAACTATC       |
| oIMR1085 (Cre)                                | GTGAAACAGCATTGCTGTCACTT       |
| ProF (Slug <sup>ckO</sup> )                   | CGTAGGTCACCTAGCGGAAACACGTTTCC |
| EX-1R (Slug <sup>ckO</sup> )                  | GTGTGTGTGTCAGTTTCGCTGTAGTTGG  |
| P7B (Slug <sup>ckO</sup> )                    | CTTCTGCATATGATTTTCATGCTTTGG   |
